# Supplementary material
Source: publisher figshare collection journal article supplement (https://gsajournals.figshare.com/ndownloader/files/18736349)
Supplement: Supplementary file 1 [file 18736349]

## Sheet: DSRs in GX-Cobb
	DSR in Guangxi indigenous chicken compared with Cobb
DSR	Chr-positon	top1%	top5%	Gene （SNPs located in gene)	Total
1	Chr1 - 1493852..1493874	2	0	EXOC4	161 DSRs
2	Chr1 - 4127988..4133786	1	1	LOC419112
3	Chr1 - 10528224..10587876	1	1	CACNA2D1
4	Chr1 - 11065197..11094625	3	0	SEMA3C
5	Chr1 - 11107272..11133855	1	2	SEMA3C
6	Chr1 - 11381659..11381894	4	1	GNAI1
7	Chr1 - 11701615..11701881	1	1	MAGI2
8	Chr1 - 11796849..11821043	2	2	MAGI2
9	Chr1 - 11846653..11875730	3	4	MAGI2
10	Chr1 - 11920643..11960535	2	1	MAGI2
11	Chr1 - 13021075..13027808	1	3	SLC26A5
12	Chr1 - 13077722..13094336	1	1	RELN
13	Chr1 - 15559273..15562824	1	1	CPNE8
14	Chr1 - 28533339..28533546	1	1	PNPLA8
15	Chr1 - 31439301..31449382	1	3	RPAP3;ATP23
16	Chr1 - 31751169..31793228	1	1	LRIG3
17	Chr1 - 33004265..33018830	1	4	MON2
18	Chr1 - 33031600..33041857	3	1	MON2
19	Chr1 - 39584964..39584971	1	1	PPP1R12A
20	Chr1 - 49209045..49209141	1	1	POLDIP3
21	Chr1 - 51855847..51861095	2	0	MYH9
22	Chr1 - 55149421..55149530	1	2	PAH
23	Chr1 - 55341369..55362660	3	2	IGF1
24	Chr1 - 65319892..65325553	1	1	IAPP
25	Chr1 - 72060093..72060282	1	1	CREBL2
26	Chr1 - 74005003..74144783	1	1	NTF3
27	Chr1 - 77343844..77348868	2	1	PTPN6
28	Chr1 - 89173894..89173930	1	1	EPHA3
29	Chr1 - 89368491..89368642	1	1	EPHA3
30	Chr1 - 102741613..102753556	1	1	APP
31	Chr1 - 114777919..114777997	2	0	DMD
32	Chr1 - 123435259..123438876	1	2	PRPS2
33	Chr1 - 124711266..124711267	2	0	MID1
34	Chr1 - 156795894..156805556	3	0	DACH1
35	Chr1 - 165825278..165825324	2	0	ELF1
36	Chr1 - 177098985..177099061	2	0	NUP58
37	Chr1 - 181308903..181309099	1	1	GRIA4
38	Chr1 - 185700111..185708939	1	1	MRE11
39	Chr1 - 187642534..187642580	2	0	CHORDC1
40	Chr2 - 4384398..4392856	1	1	GARS
41	Chr2 - 4530173..4530214	2	0	CTDSPL
42	Chr2 - 16031570..16055109	1	2	ABI1
43	Chr2 - 24928172..24939192	2	2	GLCCI1
44	Chr2 - 29107214..29107231	1	1	SNX13
45	Chr2 - 30662134..30662141	2	0	CDCA7L
46	Chr2 - 31017651..31017823	3	0	FAM126A
47	Chr2 - 33172191..33182307	1	2	JAZF1
48	Chr2 - 34071412..34097628	1	3	HACL1;BTD
49	Chr2 - 37331258..37331263	2	0	RPL15
50	Chr2 - 46596658..46596671	2	0	ELMO1
51	Chr2 - 46719410..46750442	1	1	ELMO1
52	Chr2 - 47087557..47087650	1	3	SEPT7
53	Chr2 - 47810704..47810709	2	0	BMPER
54	Chr2 - 49045820..49053657	1	2	ITGA9
55	Chr2 - 49412954..49429171	2	0	AMPH
56	Chr2 - 55350361..55350499	1	1	TNS3
57	Chr2 - 66558741..66558787	1	1	RIPK1
58	Chr2 - 89213621..89213819	1	1	EXOC3
59	Chr2 - 89437685..89443640	2	1	TEX10
60	Chr2 - 98526141..98545189	1	1	GNAL;APCDD1
61	Chr2 - 102937714..102943127	1	1	GATA6
62	Chr2 - 105104962..105105048	2	0	CDH2
63	Chr2 - 112347003..112347023	2	1	UBXN2B
64	Chr2 - 112563260..112582077	3	3	TOX
65	Chr2 - 112631336..112631481	2	0	TOX
66	Chr2 - 112692890..112723288	1	2	TOX
67	Chr2 - 117158724..117169667	2	0	TRAM1
68	Chr2 - 128266223..128271852	1	2	STK3
69	Chr2 - 130573742..130583740	1	1	DPYS
70	Chr2 - 135583637..135583646	2	0	EIF3H
71	Chr2 - 136777668..136783639	2	1	TAF2
72	Chr3 - 6646896..6646966	2	1	NRXN1
73	Chr3 - 6683869..6683894	1	1	NRXN1
74	Chr3 - 9985236..9985299	3	0	RAB1B
75	Chr3 - 20308168..20318366	1	1	ESRRG
76	Chr3 - 21200396..21200444	1	1	SMYD2
77	Chr3 - 29393770..29393883	1	1	GLP1R
78	Chr3 - 32493259..32493303	3	0	CRIM1
79	Chr3 - 36648180..36648269	2	0	CHRM3
80	Chr3 - 59381102..59381112	2	1	ECHDC1
81	Chr3 - 60821356..60891024	1	3	NKAIN2
82	Chr3 - 68476996..68479395	1	1	ATG5
83	Chr3 - 77529859..77530134	2	0	TBX18
84	Chr3 - 78078282..78085192	2	1	ME1
85	Chr3 - 83409576..83421042	1	2	LMBRD1
86	Chr3 - 87926867..87966040	1	4	HCRTR2
87	Chr3 - 106245957..106245993	2	0	ELP3
88	Chr3 - 106599167..106599391	1	1	HMBOX1
89	Chr3 - 107904710..107904712	2	0	AvBD6
90	Chr3 - 109272758..109272778	2	0	CENPQ
91	Chr3 - 109800450..109823689	1	4	RUNX2;SUPT3H
92	Chr4 - 21380662..21380697	1	1	PDGFC
93	Chr4 - 31701947..31702046	2	0	SLC10A7
94	Chr4 - 34164533..34213347	1	1	ARFIP1
95	Chr4 - 38741109..38741158	3	0	TBCK
96	Chr4 - 56918981..56919014	2	0	CAMK2D
97	Chr4 - 58605846..58626228	1	1	PDLIM5
98	Chr4 - 59205742..59205957	1	1	UNC5C
99	Chr4 - 60416655..60434236	1	2	MTTP
100	Chr4 - 60530582..60562380	1	1	DNAJB14
101	Chr4 - 75070578..75070578	1	1	KCNIP4
102	Chr4 - 75507763..75588929	2	1	SLIT2
103	Chr4 - 78015177..78041642	1	2	RAB28
104	Chr4 - 82910984..82913136	1	1	ADD1
105	Chr5 - 1470683..1474151	1	1	PTDSS2
106	Chr5 - 7815808..7816146	1	1	TEAD1
107	Chr5 - 9319731..9325476	1	1	WEE1
108	Chr5 - 14536995..14544402	2	2	BRSK2
109	Chr5 - 16529893..16529975	3	0	PPP6R3
110	Chr5 - 24489016..24489161	3	0	INO80
111	Chr5 - 26871435..26881397	1	1	RGS6
112	Chr5 - 48510236..48510267	2	0	EVL
113	Chr5 - 48524750..48524801	1	1	EVL
114	Chr6 - 4351571..4354771	2	0	TSPAN14
115	Chr6 - 4813927..4815008	2	1	RET
116	Chr6 - 6781667..6807583	1	1	CTNNA3
117	Chr6 - 6849057..6865716	1	2	CTNNA3;LRRTM3
118	Chr6 - 8546094..8563383	2	2	TMEM26
119	Chr6 - 9125241..9179340	2	2	CCDC6;SLC16A9
120	Chr6 - 9242748..9329417	3	0	CHUK
121	Chr6 - 23597997..23598020	1	3	TAF5
122	Chr6 - 25824238..25825376	1	1	ADD3
123	Chr6 - 27462005..27466794	1	1	HABP2
124	Chr7 - 288199..292760	2	3	PMS1
125	Chr7 - 11379649..11379651	2	0	ORC2
126	Chr7 - 29035759..29040412	2	0	CCDC93
127	Chr7 - 35364338..35364358	2	0	CACNB4
128	Chr8 - 3483377..3524470	3	2	CDC73;UCHL5
129	Chr8 - 11787842..11793417	1	1	CDC14A
130	Chr8 - 13623625..13623709	1	2	ARHGAP29
131	Chr8 - 13957366..14002446	1	3	DR1;CCDC18
132	Chr8 - 14413619..14421382	1	1	TGFBR3
133	Chr9 - 5396611..5399564	1	1	ITM2C
134	Chr9 - 18913115..18932533	1	3	NLGN1
135	Chr9 - 22045264..22045289	1	1	SPTSSB
136	Chr10 - 3001505..3010876	2	0	PEAK1
137	Chr10 - 3056034..3059726	3	0	TSPAN3
138	Chr10 - 3299456..3308238	2	1	ETFA
139	Chr10 - 4776934..4776944	2	0	RORA
140	Chr10 - 8773572..8773592	2	0	MYO5A
141	Chr10 - 17467764..17472541	1	1	ALDH1A3
142	Chr11 - 1694374..1694390	2	0	HYDIN
143	Chr11 - 4918836..5036000	2	2	FTO
144	Chr11 - 8480195..8480198	1	1	POP4
145	Chr11 - 12349107..12375088	1	1	CDH11
146	Chr12 - 3291327..3291354	2	0	ATRIP
147	Chr12 - 5714138..5715155	1	1	HDAC11
148	Chr12 - 8438538..8454124	1	2	ARHGEF3
149	Chr12 - 11458727..11470589	2	0	MTMR14
150	Chr12 - 12227682..12227699	2	0	FHIT
151	Chr13 - 1918560..1918582	1	1	HDAC3
152	Chr13 - 4245276..4245281	2	0	SLIT3
153	Chr13 - 7203327..7226065	1	1	GABRA1
154	Chr14 - 5149907..5150023	3	0	PRPSAP2
155	Chr14 - 13450141..13450242	2	0	EEF2KMT
156	Chr15 - 3167133..3167476	1	2	STX2
157	Chr21 - 2126317..2131146	1	1	SSU72
158	Chr21 - 4659243..4659288	1	1	EMC1
159	Chr26 - 1046728..1046776	2	0	CEPT1
160	Chr26 - 1925274..1925282	1	1	NFASC
161	Chr28 - 3035951..3036986	1	1	STK11

## Sheet: DSRs in GX-Leghorn
	DSR in Guangxi indigenous chicken compared with Leghorn
	Chr-positon	top1%	top5%	Gene （SNPs located in gene)	Total DSRs
1	Chr1 - 6822780..6822838	1	1	BEND7	161
2	Chr1 - 11381790..11381894	2	1	GNAI1
3	Chr1 - 12301871..12301910	3	0	MAGI2
4	Chr1 - 15285830..15285975	1	1	ABCD2
5	Chr1 - 18848046..18855993	1	2	ZBED4;ALG12
6	Chr1 - 18874525..18874648	2	1	CRELD2
7	Chr1 - 23657093..23662159	1	1	KCND2
8	Chr1 - 44911011..44911014	2	0	CRADD
9	Chr1 - 52834951..52835019	1	1	LARGE1
10	Chr1 - 55341369..55380576	3	5	IGF1
11	Chr1 - 55447698..55447751	2	0	PARPBP
12	Chr1 - 56978429..57001053	1	1	BRAF
13	Chr1 - 58458223..58564414	2	3	C7orf73
14	Chr1 - 68217023..68217039	2	0	ARNTL2
15	Chr1 - 68443287..68448152	1	2	ARFGAP3
16	Chr1 - 71912486..71924945	1	3	BORCS5
17	Chr1 - 89173832..89173930	1	3	EPHA3
18	Chr1 - 119119176..119126083	1	1	SMPX
19	Chr1 - 130587127..130587137	1	1	HERC2
20	Chr1 - 137105507..137119710	1	2	RASA3
21	Chr1 - 156890358..156954635	3	5	DACH1
22	Chr1 - 167459029..167459084	1	1	TSC22D1
23	Chr1 - 177095168..177099061	1	3	NUP58
24	Chr1 - 179184538..179184598	1	1	PSPC1
25	Chr1 - 195030364..195030411	1	1	GDPD5
26	Chr2 - 5472476..5500811	1	2	SCN5A
27	Chr2 - 5532065..5532091	1	1	SCN5A
28	Chr2 - 16585339..16600080	2	3	GPR158
29	Chr2 - 20122261..20122267	1	1	RSU1
30	Chr2 - 28858878..28917374	1	3	AHR
31	Chr2 - 32997717..33020862	1	1	TAX1BP1
32	Chr2 - 40667618..40673992	1	2	CNOT10
33	Chr2 - 41173345..41173393	2	0	SNRK
34	Chr2 - 41384320..41384429	1	1	NOD1
35	Chr2 - 44811942..44837411	1	1	CLASP2
36	Chr2 - 44929045..44932781	1	2	CLASP2
37	Chr2 - 46792373..46839772	1	3	ELMO1
38	Chr2 - 49332158..49336650	1	1	AMPH
39	Chr2 - 49526883..49548737	2	2	VPS41
40	Chr2 - 55628402..55656170	3	2	SLC12A7
41	Chr2 - 60716054..60736549	2	2	SIRT5
42	Chr2 - 66832232..66832233	1	1	EXOC2
43	Chr2 - 68913492..68913734	3	1	CDH20
44	Chr2 - 80822933..80850285	2	5	ZPBP
45	Chr2 - 81133376..81137585	1	3	GRB10
46	Chr2 - 81170386..81170481	2	1	GRB10
47	Chr2 - 90878112..90882049	1	1	MBP
48	Chr2 - 105104962..105105048	2	0	CDH2
49	Chr2 - 105155316..105155541	1	2	CDH2
50	Chr2 - 115955427..115955460	3	0	CPA6
51	Chr2 - 117187317..117213487	1	2	LACTB2;XKR9
52	Chr2 - 125205493..125268136	5	8	NECAB1
53	Chr2 - 127659327..127693384	4	2	CPQ
54	Chr2 - 130573742..130583740	1	1	DPYS
55	Chr2 - 136423205..136423379	1	2	TNFRSF11B
56	Chr2 - 136808235..136811003	1	1	DEPDC6
57	Chr2 - 138178510..138186191	1	2	FBXO32
58	Chr2 - 148900118..148900120	1	1	ZC3H3
59	Chr3 - 7471892..7471958	2	1	FSHR
60	Chr3 - 17137129..17137209	2	0	ACBD3
61	Chr3 - 20283584..20308168	1	3	ESRRG
62	Chr3 - 20336925..20336933	2	0	ESRRG
63	Chr3 - 21321061..21364260	1	2	PROX1
64	Chr3 - 48283974..48297437	1	2	PROX1;GINM1
65	Chr3 - 60543231..60575737	1	2	NKAIN2
66	Chr3 - 61402462..61446215	1	2	PKIB
67	Chr3 - 69023769..69039152	1	1	PKIB;POPDC3
68	Chr3 - 72999694..73040710	1	1	FHL5
69	Chr3 - 73169362..73176396	2	2	FUT9
70	Chr3 - 88627212..88640223	1	1	ELOVL5
71	Chr3 - 89003278..89015455	2	1	ELOVL5;MCPH1
72	Chr4 - 49760206..49760227	3	0	TNKS
73	Chr4 - 56928540..56940980	1	1	CAMK2D
74	Chr4 - 58521965..58522146	1	1	CASP6
75	Chr4 - 67200353..67250063	1	7	COMMD8
76	Chr4 - 75134473..75140125	2	1	COMMD8;KCNIP4
77	Chr4 - 75322442..75333646	1	2	KCNIP4
78	Chr4 - 75588901..75588929	1	1	SLIT2
79	Chr4 - 79685438..79733908	2	9	EVC2
80	Chr4 - 79739032..79739264	2	0	EVC2
81	Chr4 - 86509915..86510039	1	3	SMYD1
82	Chr5 - 4604199..4616174	2	1	MPPED2
83	Chr5 - 16529965..16529975	2	0	PPP6R3
84	Chr5 - 18981418..18981441	1	1	CD44
85	Chr5 - 23830888..23845271	1	5	PHF21A
86	Chr5 - 24454542..24531121	3	7	INO80;CHP1
87	Chr5 - 39776552..39780449	1	2	NRXN3
88	Chr5 - 44045266..44092084	1	6	TTC7B
89	Chr6 - 4335443..4354909	2	2	TSPAN14
90	Chr6 - 4414589..4423395	2	1	EXOSC3
91	Chr6 - 4813927..4813965	3	2	RET
92	Chr6 - 6345236..6376003	2	2	PCDH15
93	Chr6 - 6525729..6526081	2	0	PCDH15
94	Chr6 - 6791872..6794988	2	1	CTNNA3
95	Chr6 - 6892202..6892348	4	0	CTNNA3;LRRTM3
96	Chr6 - 7844527..7878031	1	3	JMJD1C
97	Chr6 - 8340698..8349995	1	1	ARID5B
98	Chr6 - 15833140..15833177	1	1	ZSWIM8
99	Chr6 - 16140744..16140805	6	8	PPP3CB
100	Chr6 - 21101059..21106732	2	1	BLNK
101	Chr6 - 23597997..23598020	1	2	TAF5
102	Chr6 - 27855948..27856008	2	0	ABLIM1
103	Chr6 - 27953154..27957588	1	1	ABLIM1
104	Chr6 - 27997570..27997591	1	1	ABLIM1
105	Chr6 - 29868507..29868508	2	0	CACUL1
106	Chr6 - 30272086..30284695	1	3	TIA1
107	Chr7 - 292734..292760	2	0	PMS1
108	Chr7 - 2817493..2817547	2	0	CPS1
109	Chr7 - 3115342..3115379	2	0	ERBB4
110	Chr7 - 11196187..11196240	3	0	SPATS2L
111	Chr7 - 11270173..11270280	1	1	AOX1
112	Chr7 - 13451057..13500660	1	1	CD28
113	Chr7 - 29035759..29048073	2	1	CCDC93
114	Chr7 - 33378869..33378930	1	1	GTDC1
115	Chr7 - 34974754..34989728	2	0	KIF5C
116	Chr7 - 35315017..35315028	1	1	CACNB4
117	Chr7 - 35364338..35374758	1	4	CACNB4
118	Chr8 - 1018761..1069121	2	1	VAV3
119	Chr8 - 15922369..15944116	2	2	HS2ST1
120	Chr8 - 25288532..25303876	1	2	SSBP3
121	Chr8 - 27584959..27584993	2	3	USP1
122	Chr9 - 10319686..10328261	2	1	ATP1B3
123	Chr10 - 10739141..10758932	1	2	SPPL2A
124	Chr10 - 11430464..11443930	1	1	SH3GL3
125	Chr11 - 4918836..5046286	1	6	FTO
126	Chr11 - 5356441..5403882	3	2	TOX3
127	Chr11 - 7517985..7537890	5	4	LONP2
128	Chr11 - 7714824..7742915	1	3	ITFG1
129	Chr11 - 14837547..14837582	2	0	MAF
130	Chr11 - 15999159..16008929	1	1	NAT
131	Chr12 - 8788990..8798270	2	1	SLMAP
132	Chr12 - 9672095..9681880	2	1	MGLL;ABTB1
133	Chr12 - 12223973..12223998	1	1	FHIT
134	Chr12 - 12553673..12553676	1	1	FHIT
135	Chr13 - 14101789..14101794	2	0	RASGEF1C
136	Chr14 - 3538763..3553879	2	2	SDK1
137	Chr14 - 4963304..4963466	2	1	TOM1L2
138	Chr14 - 5149907..5150023	1	2	PRPSAP2
139	Chr15 - 4981524..4981531	3	0	GTF2H3
140	Chr15 - 10993611..10993617	1	1	MTMR3
141	Chr15 - 11021624..11021685	2	0	MTMR3
142	Chr15 - 11238444..11286206	2	0	EWSR1
143	Chr17 - 1895013..1911501	1	1	RGS3
144	Chr17 - 3006078..3006100	1	1	ATP6V1G1
145	Chr17 - 5385792..5390979	3	2	FAM102A
146	Chr17 - 8578410..8578421	2	0	C9orf69
147	Chr18 - 7364879..7393237	1	1	PRKCA
148	Chr18 - 7550203..7557345	1	2	CEP112
149	Chr18 - 10035098..10043992	1	1	PCYT2
150	Chr19 - 5227082..5227131	2	0	MYO1C
151	Chr19 - 6980026..6980111	1	1	VPS53
152	Chr20 - 791926..791968	1	2	RALGAPB
153	Chr20 - 819766..819826	1	2	RALGAPB
154	Chr20 - 8624906..8633977	1	1	GID8;SLC17A9
155	Chr20 - 8978229..9026778	2	4	ARFGAP1;COL20A1
156	Chr21 - 2052794..2052941	1	1	MIB2
157	Chr21 - 2131146..2139727	1	1	SSU72
158	Chr23 - 4156406..4156409	1	1	ADPRHL2
159	Chr26 - 1917813..1990924	1	3	NFASC;CNTN2
160	Chr27 - 3651242..3651312	1	1	IGF2BP1
161	Chr27 - 4852488..4854151	1	1	TOP2A

## Sheet: DSRs in GX-CH
	DSR in Guangxi indigenous chicken compared with Chahua chicken
	Chr-positon	top1%	top5%	Gene （SNPs located in gene)	Total DSRs
1	Chr1 - 4348920..4348936	1	1	TAF3	99
2	Chr1 - 6701112..6710553	1	1	OPTN
3	Chr1 - 9624933..9624963	1	1	SEMA3E
4	Chr1 - 23480606..23480755	1	1	TSPAN12
5	Chr1 - 24847135..24880613	1	1	ST7;CAPZA2
6	Chr1 - 26977627..27016735	1	1	ZNF277
7	Chr1 - 31439301..31439344	2	0	RPAP3
8	Chr1 - 47131937..47144143	2	1	ANKS1B
9	Chr1 - 48898354..48898414	2	0	ATF7IP
10	Chr1 - 68217023..68217039	2	0	ARNTL2
11	Chr1 - 92860928..92864367	2	1	POU1F1
12	Chr1 - 98087885..98087899	1	1	HSPA13
13	Chr1 - 114851484..114859333	2	0	DMD
14	Chr1 - 145387870..145387884	1	1	MBNL2
15	Chr1 - 165825278..165825324	2	0	ELF1
16	Chr1 - 172731660..172731661	2	0	DCLK1
17	Chr1 - 175107234..175172247	1	3	USPL1
18	Chr1 - 184027721..184066401	2	0	CNTN5
19	Chr1 - 186657836..186701394	1	1	FAT3
20	Chr2 - 8496339..8503805	2	1	LMBR1
21	Chr2 - 13265930..13295211	1	1	PARD3
22	Chr2 - 23022477..23039909	3	1	VPS50
23	Chr2 - 24720749..24720772	1	1	C1GALT1
24	Chr2 - 24939192..24939245	1	1	GLCCI1
25	Chr2 - 29341698..29369383	1	1	HDAC9
26	Chr2 - 47087557..47087649	2	1	SEPT7
27	Chr2 - 68165686..68172348	1	1	BCL2
28	Chr2 - 89617390..89622143	1	1	STX17
29	Chr2 - 97556442..97556443	2	0	MPPE1
30	Chr2 - 118052823..118064779	1	2	TERF1
31	Chr2 - 128271852..128271979	1	1	STK3
32	Chr2 - 142034911..142050121	1	1	WISP1
33	Chr3 - 17130208..17151289	1	2	ACBD3
34	Chr3 - 17419738..17419776	2	0	LBR
35	Chr3 - 26988299..27014972	1	1	TTC7A
36	Chr3 - 27591571..27591599	2	0	BRE
37	Chr3 - 37959634..37959657	1	1	GPR137B
38	Chr3 - 39814602..39814617	2	0	TSNAX
39	Chr3 - 64996467..64996475	1	1	HDAC2
40	Chr3 - 88997393..89015296	1	3	MCPH1
41	Chr3 - 91897446..91906030	1	2	ERICH1
42	Chr3 - 106491123..106504574	2	1	INTS9
43	Chr3 - 107886475..107886514	1	1	AvBD10
44	Chr4 - 4927211..4927242	1	1	FGF13
45	Chr4 - 8643895..8644138	4	1	CHM
46	Chr4 - 56963772..56963795	1	2	CAMK2D
47	Chr4 - 60497638..60497669	1	2	DAPP1
48	Chr4 - 74077941..74090728	1	1	LGI2
49	Chr4 - 85083275..85108294	2	1	MAEA
50	Chr5 - 1643195..1643254	3	0	ZDHHC13
51	Chr5 - 4469447..4476927	1	1	KCNA4
52	Chr5 - 8340713..8340720	1	1	GALNT18
53	Chr5 - 9026723..9026727	1	1	SBF2
54	Chr5 - 22807300..22807396	1	1	CELF1
55	Chr5 - 30180847..30218616	2	2	RYR3
56	Chr5 - 31293356..31293366	2	0	MEIS2
57	Chr5 - 36288865..36334502	2	1	RALGAPA1
58	Chr5 - 45097424..45101826	1	1	ITPK1
59	Chr6 - 2532542..2532594	1	1	BMPR1A
60	Chr6 - 2601594..2608868	1	1	SNCG
61	Chr6 - 4815008..4825263	1	2	RET
62	Chr6 - 6969925..7034555	3	2	CTNNA3
63	Chr6 - 17592783..17592817	2	0	CYP2C23a
64	Chr6 - 20359253..20366902	1	1	PDE6C
65	Chr6 - 25857963..25857964	1	1	MXI1
66	Chr6 - 26781195..26781223	2	0	VTI1A
67	Chr6 - 29868403..29868508	3	2	CACUL1
68	Chr7 - 5889925..5889987	1	1	USP40
69	Chr7 - 11047345..11047381	1	3	C7H2ORF69
70	Chr7 - 11929298..11929426	1	1	BMPR2
71	Chr7 - 27156214..27163273	1	1	ADCY5
72	Chr7 - 33393730..33400217	1	2	GTDC1
73	Chr7 - 35388355..35388597	2	1	CACNB4
74	Chr9 - 10228248..10245126	1	3	RASA2
75	Chr9 - 10328240..10328261	2	0	ATP1B3
76	Chr9 - 14672993..14676702	2	0	LPP
77	Chr10 - 2450062..2450160	1	1	UBL7
78	Chr10 - 8773572..8773592	2	0	MYO5A
79	Chr10 - 10435783..10435816	1	1	COPS2
80	Chr10 - 18168636..18179832	1	2	RAB11A
81	Chr11 - 11259453..11259486	2	0	UBA2
82	Chr11 - 13108417..13151682	1	2	CDH8
83	Chr11 - 16410885..16431121	1	1	CDH13
84	Chr12 - 19420382..19426968	1	1	SRGAP3
85	Chr13 - 15462744..15504299	1	1	H2AFY
86	Chr14 - 7453218..7472129	1	1	GNPTG
87	Chr15 - 3289194..3332994	3	1	RIMBP2
88	Chr15 - 5435371..5435419	1	1	IFT81
89	Chr15 - 6455620..6455650	1	1	PTPN11
90	Chr15 - 9536922..9566938	1	1	RAB35
91	Chr17 - 5385607..5390869	1	1	FAM102A
92	Chr18 - 6331224..6331227	1	1	C18H17ORF67
93	Chr18 - 7534420..7550260	1	1	CEP112
94	Chr20 - 13311178..13328673	1	2	SALL4
95	Chr23 - 2445737..2445792	1	1	PTPRU
96	Chr24 - 2123251..2136298	2	0	OPCML
97	Chr26 - 1925282..1941432	1	1	NFASC
98	Chr26 - 4533317..4579107	1	2	MLN
99	Chr28 - 646404..646411	2	0	LMNB2
